# Supplementary material
Source: Royal Society of Chemistry journal article supplement (doi:10.1039/d6cc03193e)
Supplement: d6cc03193e1.pdf [file d6cc03193e1.pdf]

## Electronic Supplementary Information

### **Oleylamine Passivated Hydrophobic Sulfur Quantum Dots as Highly Efficient Adsorbents for Gaseous Iodine Sequestration**

Hammad Hasan, Neelima Varshney and Md Palashuddin Sk\*

Nanoscale Functional Materials Laboratory, Department of Chemistry, Aligarh Muslim University, Aligarh-202002, Uttar Pradesh, India

E-mail: palashuddin.ch@amu.ac.in

### **Experimental Section**

#### **Materials**

All chemicals and reagents were purchased from commercial suppliers and used as received without further purification.

#### **Synthesis of Sdots**

Sdots were synthesized through a solvothermal approach using elemental sulfur and oleylamine. Briefly, elemental sulfur (240 mg, 7.5 mmol) was added to oleylamine (5 mL) and stirred at 50 °C for 5 min, during which the reaction mixture gradually changed to an orange color. The resulting mixture was then transferred into a Teflon-lined autoclave and heated at 180 °C for 4 h. After naturally cooling to room temperature, a dark yellow-brown viscous liquid product was obtained.

The synthesized Sdots exhibited hydrophobic behavior, being readily dispersible in n-hexane while remaining immiscible with water and ethanol. For purification, the crude product was dissolved in n-hexane followed by the addition of ethanol (5 mL). The mixture was subsequently centrifuged to remove unreacted species and excess organic residues, after which the ethanol layer was discarded. The purified Sdots dispersed in n-hexane were collected for further characterization and adsorption studies.

## **Preparation of Sdots-coated Cotton for Contact Angle Measurement**

For contact angle measurements, 200 mg of medicated cotton was immersed in 2 mL of an Sdots dispersion in n-hexane (20 mg mL<sup>-1</sup>) and dried at room temperature. The coating process was repeated three times to ensure uniform deposition of Sdots over the cotton surface. The dried Sdots-coated cotton was subsequently used for contact angle analysis.

## **Iodine Vapor Adsorption Study**

The iodine vapor adsorption performance of the synthesized Sdots was evaluated by exposing the material to iodine vapor generated from solid iodine crystals. Briefly, iodine crystals were placed in a broad open beaker inside a sealed 1000 mL oil bath setup, while a watch glass containing 100 mg of Sdots was positioned alongside the iodine source. The system was tightly sealed using aluminium foil to minimize vapor loss, and an excess amount of iodine was used to ensure saturated iodine vapor conditions throughout the experiment. The adsorption setup was maintained at 75 °C for 6 h, and the adsorption behavior was monitored at regular 2 h intervals. Following exposure, the watch glass containing the Sdots was weighed, and the amount of adsorbed iodine was calculated from the corresponding weight gain. A distinct color change of the Sdots from brown to black was observed after iodine exposure, indicating efficient adsorption of iodine vapor. The iodine uptake capacity was calculated using the following equation:

$$q_t = \frac{W_t - W_0}{W_0} \times 100$$

Where  $W_0$  and  $W_t$  represent the initial and final masses of the Sdots, respectively.

## **Iodine Vapor Adsorption under Humid Conditions**

The iodine vapor adsorption experiment under humid conditions was performed following the same procedure described above, except that an open 5 mL glass vial containing distilled water was additionally placed inside the sealed adsorption setup to generate a humid atmosphere. Under these conditions, the synthesized Sdots exhibited an iodine adsorption capacity of 2307 mg g<sup>-1</sup>.

### Adsorption kinetics Study

The adsorption kinetics of iodine vapor uptake by Sdots was further analyzed using the Ho and McKay pseudo-second-order kinetic model according to the following equation:

$$\frac{t}{q_t} = \frac{1}{k_2 q_e^2} + \frac{t}{q_e}$$

where  $q_t$  and  $q_e$  represent the amounts of iodine adsorbed ( $\text{mg g}^{-1}$ ) at time  $t$  and at equilibrium, respectively, while  $k_2$  denotes the pseudo-second-order rate constant. The adsorption data exhibited a good linear fit with an  $R^2$  value of 0.964, indicating efficient iodine uptake governed by the strong affinity of iodine molecules toward the hydrophobic Sdots surface.

### Adsorption of Iodine from Cyclohexane Solution

Liquid-phase iodine adsorption experiments were carried out using iodine dissolved in cyclohexane. Briefly, 5 mg of Sdots was added to 3 mL of a 2 mM iodine solution in cyclohexane under ambient conditions. UV-vis absorption spectra of the solution were recorded at different time intervals (0, 4, 8, 12, 16, 20, and 24 min) to monitor the decrease in the characteristic iodine absorption band at  $\sim 522$  nm.

The adsorption capacity of Sdots toward molecular iodine and the corresponding removal efficiency were determined using the following equations:

$$W = \frac{(C_0 - C_t)V}{m}$$
$$Q(\%) = \frac{(C_0 - C_t) \times 100}{C_0}$$

Where  $W$  represents the equilibrium adsorption capacity ( $\text{mg g}^{-1}$ ), while  $C_0$  and  $C_t$  denote the initial and residual concentrations of iodine in solution ( $\text{mg L}^{-1}$ ), respectively.  $V$  (L) corresponds to the volume of the iodine solution, and  $m$  (g) is the mass of Sdots used for adsorption.

## Regeneration and Recyclability Studies

To evaluate the practical applicability and recyclability of the Sdots, successive adsorption–desorption cycles were performed. The iodine-loaded Sdots were immersed in methanol, where spontaneous desorption occurred. The methanol phase gradually turned from colorless to dark brown, confirming effective release of adsorbed iodine species. After 6 h of standing, the regenerated Sdots recovered their dark original brown colour, indicating successful regeneration of the material.

## Elemental Composition and Molar Ratio Calculations for Sdots

To quantify the elemental composition of the synthesized Sdots and correlate it with iodine adsorption performance, CHNS elemental analysis and quantitative XPS measurements were performed. The CHNS results are summarized below.

| Elements   | Carbon (C) | Hydrogen (H) | Nitrogen (N) | Sulfur (S) |
|------------|------------|--------------|--------------|------------|
| Weight (%) | 77.99      | 12.4         | 4.02         | 1.6        |

The bulk analysis reveals the sulfur content of 1.6 wt%, while quantitative XPS analysis indicates a surface sulfur content of 1.3 at%, corresponding to approximately 3.37 wt%. A comparison of bulk and surface sulfur contents shows a clear enrichment at the surface, with a surface-to-bulk mass ratio of approximately  $3.37:1.6 \approx 2.1:1$ , indicating the enrichment of sulfur species on the surface of the Sdots.

## Control Experiments

Control experiments were carried out under identical iodine vapor adsorption conditions using 100 mg of elemental sulfur powder and 100 mg of oleylamine separately in place of Sdots. The iodine uptake was determined from the corresponding weight gain after 6 h of exposure at 75 °C. Oleylamine exhibited an iodine uptake capacity of 1260.9 mg g<sup>-1</sup>, while elemental sulfur showed an uptake capacity of 683.6 mg g<sup>-1</sup>.

Iodine uptake capacity of Sdots = 2.676 g g<sup>-1</sup>

$$\text{Moles of Iodine adsorbed} = 2.676/253.8 = 0.0105 \text{ mol/g Sdots}$$

### **Surface Sulfur to Iodine Molar Ratio**

XPS analysis indicates a surface sulfur content of 1.3 at%, corresponding to approximately 3.37 wt%.

3.37g sulfur presents per 100g Sdots, i.e. 0.0337g sulfur/g Sdots

$$\text{Moles of sulfur} = \frac{0.0337}{32.06} \cong 0.001 \text{ mole /g Sdots}$$

Surface to Iodine ratio, 0.001: 0.0105 = 0.1: 1

### **Surface Nitrogen to Iodine Molar Ratio**

Quantitative XPS analysis indicated a nitrogen content of 3.56 at%, corresponding to approximately 4.04 wt%.

4.04g nitrogen presents per 100g Sdots, i.e. 0.0404g nitrogen/g Sdots

$$\text{Moles of nitrogen} = \frac{0.0404}{14.007} \cong 0.003 \text{ mole /g Sdots}$$

Nitrogen to Iodine ratio, 0.003: 0.0105  $\cong$  0.3: 1

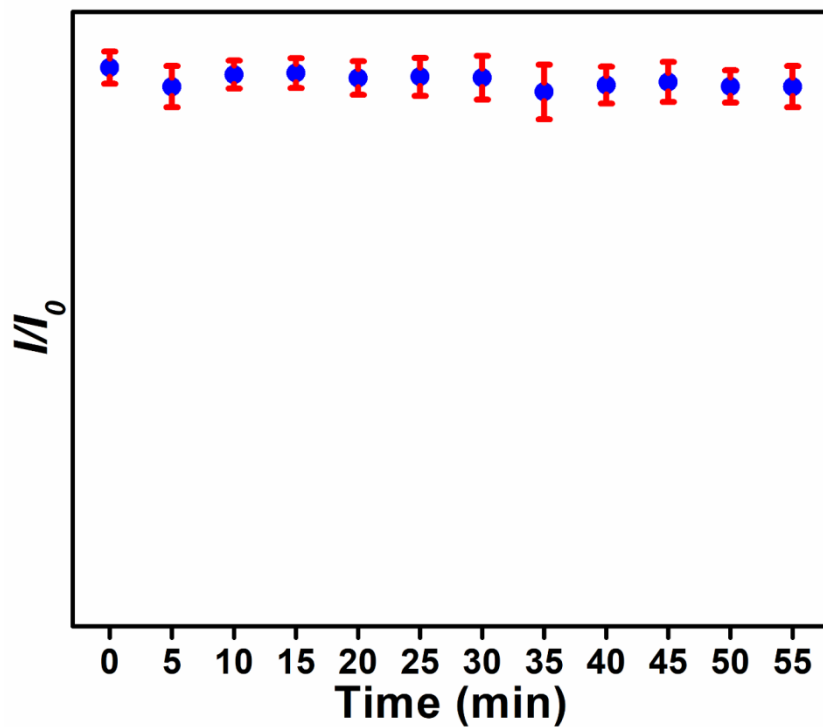

Fig. S1 Photostability plot of Sdots under continuous UV irradiation.

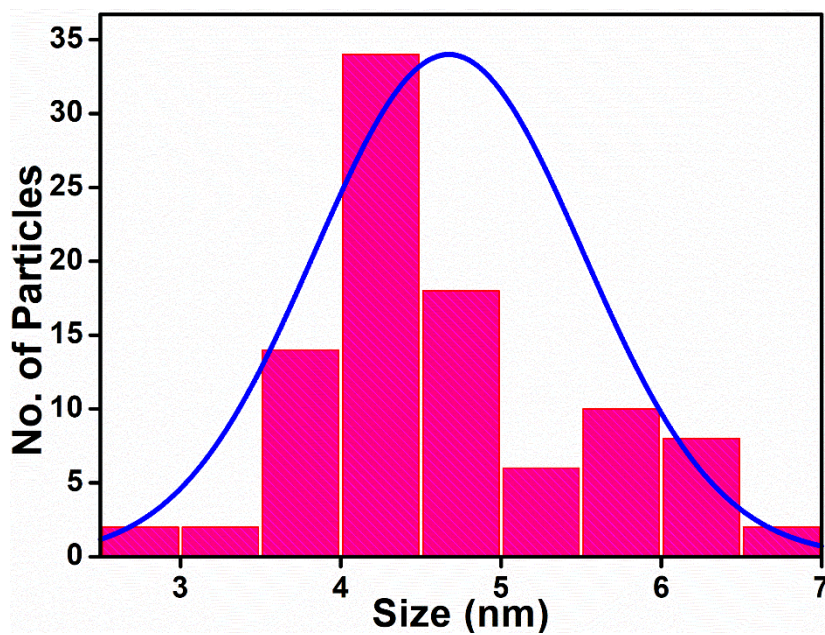

Fig. S2 Particle size distribution histogram of Sdots.

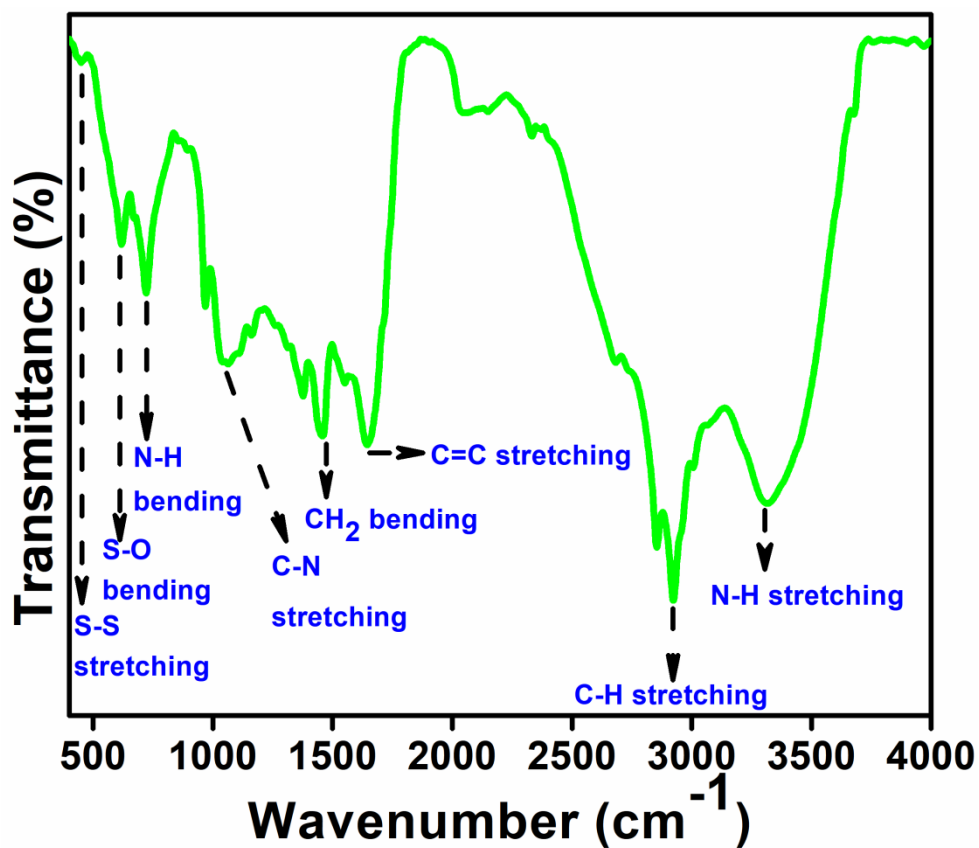

Fig. S3 FTIR spectrum of Sdots showing characteristic surface functional groups.

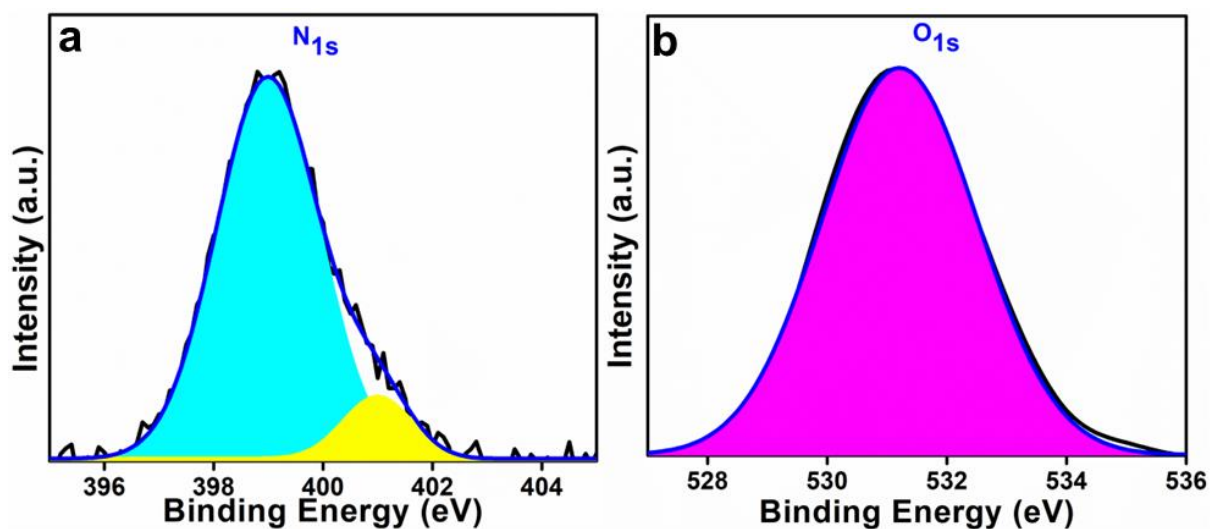

Fig. S4 High-resolution XPS spectra of Sdots consisting of (a)  $N_{1s}$  band and (b)  $O_{1s}$  band.

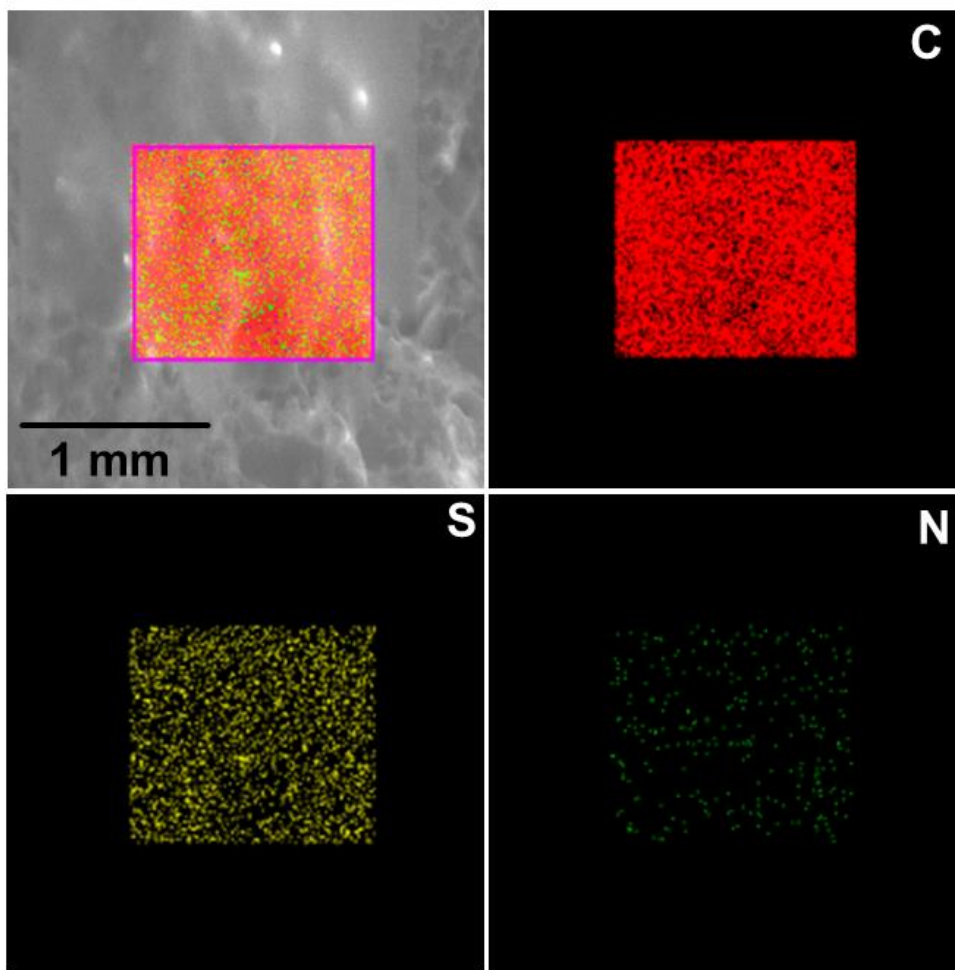

**Fig. S5** Elemental mapping of Sdots, indicating the presence of C, S, and N elements.

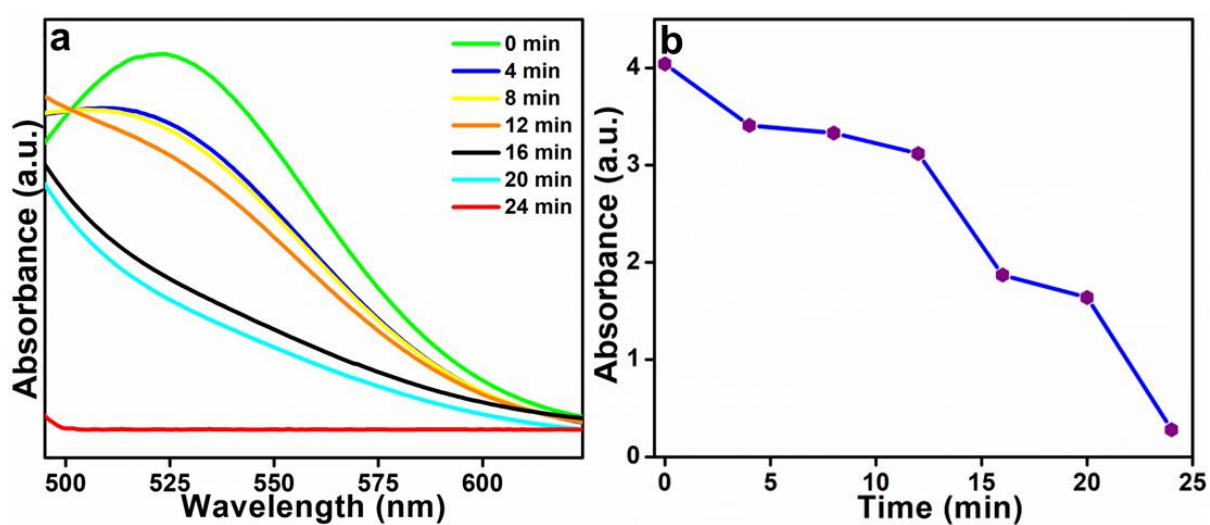

**Fig. S6** (a) UV-vis spectra tracking the decrease in iodine concentration in cyclohexane with time. (b) Absorbance at 523 nm decreasing with time.

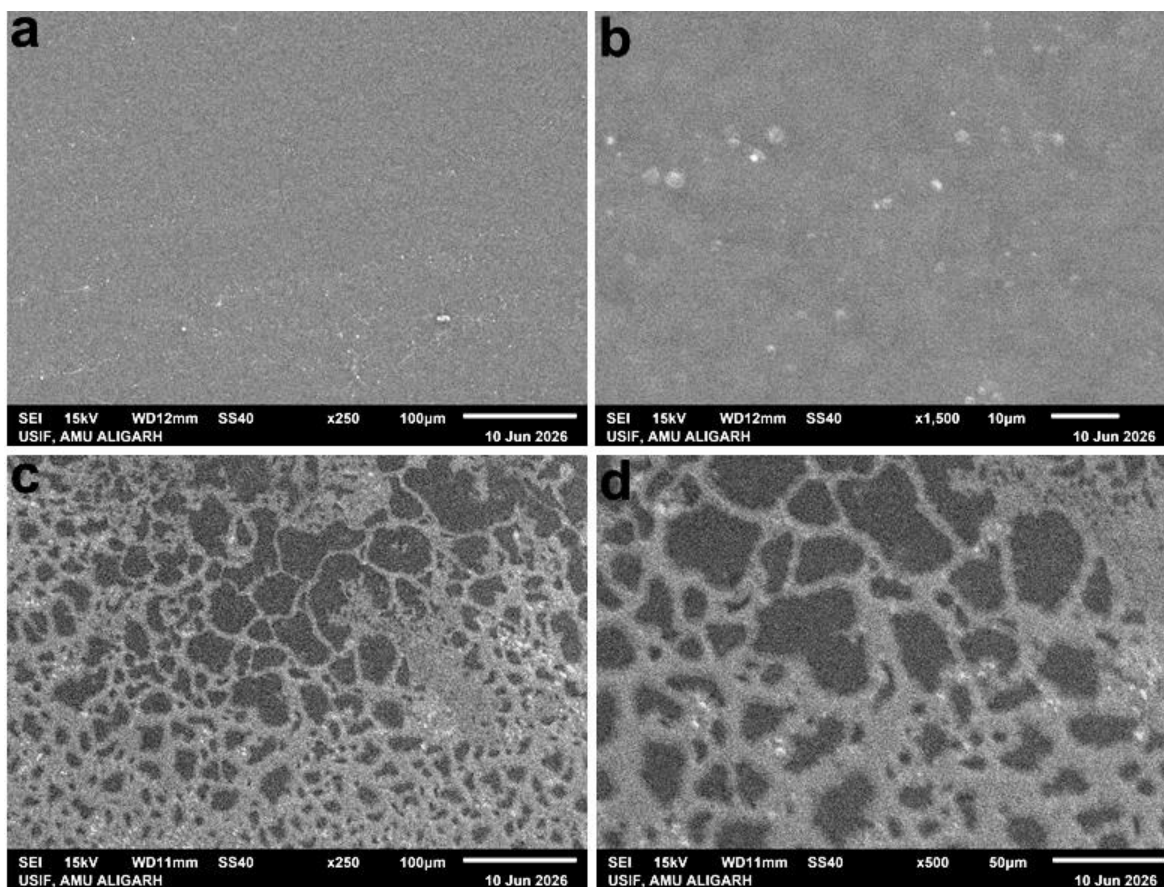

Fig. S7 SEM images of (a & b) pristine Sdots and (c & d) Sdots after iodine adsorption.

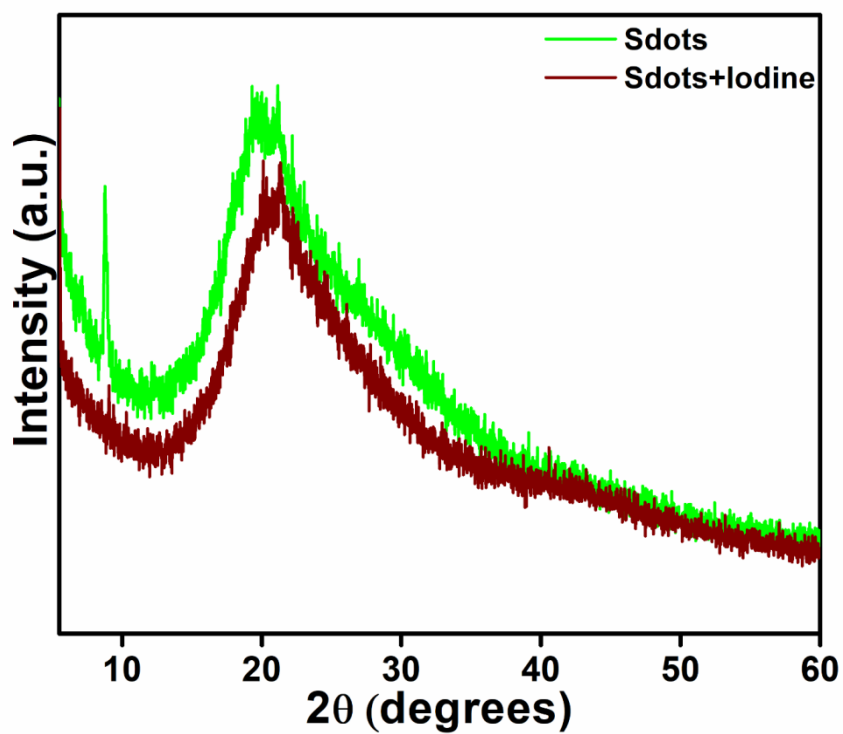

Fig. S8 PXR D patterns of pristine Sdots and iodine-adsorbed Sdots.

**Note:** The diffraction peak at  $2\theta = 8.7^\circ$  in the pristine Sdots arises from interlayer spacing formed in the dried sample.<sup>1</sup>

Reference: 1) *Appl. Sci.* 2024, **14**(24), 11701.

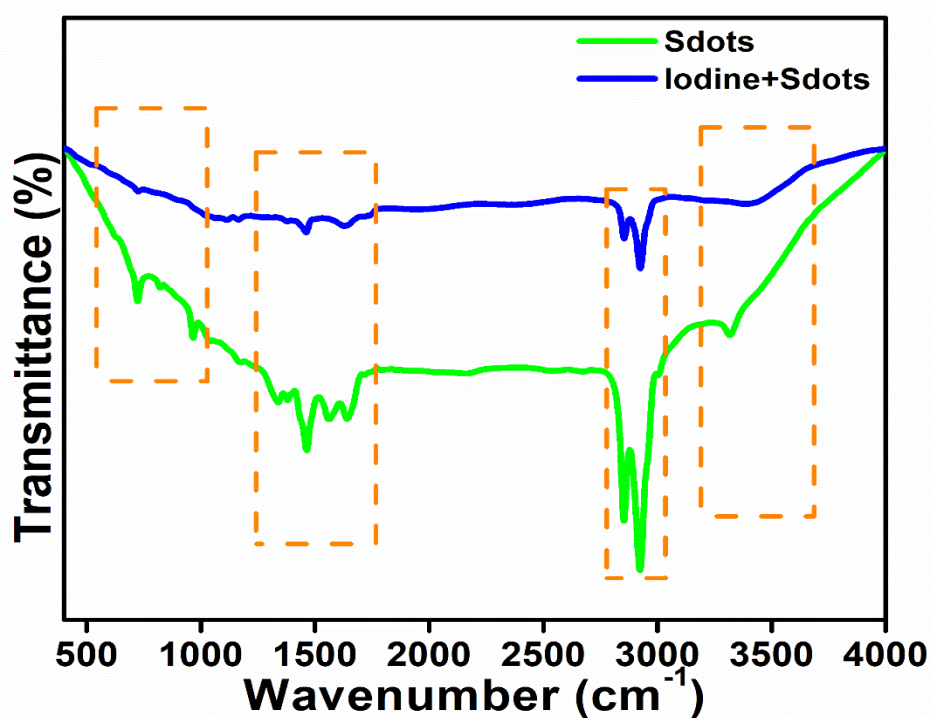

**Fig. S9** FTIR spectrum of Sdots and iodine adsorbed Sdots.

**Table S1:** Comparative overview of iodine adsorption capacities of representative adsorbent materials from recent literature reports.

| Material                 | Class                                     | Synthesis method                                 | Phase              | Adsorption capacity (mg/g) | Key remarks                                                                                                                                                                        | Reference                                       |
|--------------------------|-------------------------------------------|--------------------------------------------------|--------------------|----------------------------|------------------------------------------------------------------------------------------------------------------------------------------------------------------------------------|-------------------------------------------------|
| Bi-Thio HCP              | Sulfur-enriched hyper-crosslinked polymer | Friedel-Crafts alkylation of 2,2'-bithiophene    | Vapor / aqueous    | 1960 / 1660                | Sulfur-rich porous polymer exhibiting strong iodine affinity through electron-rich sulfur sites; however, the synthesis involves polymerization and prolonged reaction conditions. | RSC Appl. Polym., 2026, DOI: 10.1039/D5LP00400D |
| CPT-HDI                  | Cryptand-based polymer                    | One-step cross-linking reaction (CPT + HDI)      | Vapor/ cyclohexane | 3520 / 662                 | The synthesis method is not facile, expensive and requires a long reaction time.                                                                                                   | ACS Appl. Polym. Mater. 2026, 8(6), 4092-4102   |
| C4P-Tab                  | Calix[4]pyrrole POP                       | Crosslinking of alkynyl calix[4]pyrrole monomers | Vapor / aqueous    | 3870 / 3960                | The material requires a multistep and atom-inefficient synthesis, which increases the cost and limits scalability compared to simpler porous organic polymers.                     | J. Mater. Chem. A, 2026,14, 13658-13668         |
| CuS/AC                   | Activated carbon composite                | Impregnation                                     | Vapor              | 486                        | Non-uniform metal distribution limits adsorption efficiency                                                                                                                        | Chem. Eng. Sci., 2025, 303, 120955              |
| Cu-CP@CNT                | CNT composite                             | Functionalization + solvothermal                 | Vapor              | 729.9                      | Multistep synthesis and low Adsorption capacity.                                                                                                                                   | J. Water Process Eng., 2025, 69, 106569         |
| Cu-Cu <sub>2</sub> O/RGO | Graphene composite                        | Chemical reduction                               | Aqueous            | 152.1                      | Low adsorption capacity.                                                                                                                                                           | J. Environ. Chem. Eng., 2025, 13, 115563        |
| Cdots-Agg                | Carbon dot aggregates                     | Solvothermal (DPT precursor)                     | Vapor/ aqueous     | 1007                       | Mesoporous aggregates enable dual-phase iodine capture but exhibit low                                                                                                             | Small, 21(46), 2025, e08118                     |

|                                                 |                                                       |                                   |                     |                         |                                                                                                                                                                                                                                          |                                                            |
|-------------------------------------------------|-------------------------------------------------------|-----------------------------------|---------------------|-------------------------|------------------------------------------------------------------------------------------------------------------------------------------------------------------------------------------------------------------------------------------|------------------------------------------------------------|
|                                                 |                                                       |                                   |                     |                         | adsorption capacity.                                                                                                                                                                                                                     |                                                            |
| PANI/Bi <sub>2</sub> S <sub>3</sub> nanoflowers | Bi <sub>2</sub> S <sub>3</sub> /polyaniline composite | Chemical oxidative polymerization | Vapor / cyclohexane | 3307 / 1306.9           | Sulfur-containing composite exhibiting efficient iodine capture through combined Bi-I interactions and nitrogen-containing adsorption sites; however, the material requires inorganic nanocomposite synthesis and polymer incorporation. | Colloids Surf. A Physicochem. Eng. Asp., 2025, 709, 136096 |
| GOF-LS                                          | Graphene organic framework                            | Multistep                         | Vapor/ cyclohexane  | 2320/ 1315.1            | The fabrication method is complex, expensive, and involves multiple steps, making scalability challenging.                                                                                                                               | ACS Appl. Nano Mater. 2024, 7(14), 16475-16487.            |
| ZnO/MWCN Ts                                     | CNT composite                                         | Arc discharge                     | Vapor               | 15.2                    | Energy-intensive synthesis and very low iodine uptake.                                                                                                                                                                                   | Sci. Rep., 2024, 14, 4242                                  |
| CCNL carbon dots                                | Carbon dots                                           | Hydrothermal + multistep assembly | Vapor               | 231.9                   | Complex synthesis and limited structural tenability.                                                                                                                                                                                     | Chem. Eng. J., 2024, 479, 147753                           |
| Ag@ACF                                          | Activated carbon fiber composite                      | Hydrothermal functionalization    | Vapor               | 372                     | Improved porosity but limited chemisorption capability.                                                                                                                                                                                  | Appl. Surf. Sci., 2024, 643, 158644                        |
| Coconut shell activated carbon                  | Carbon                                                | Carbonization/activation          | Vapor               | 790                     | Although the carbon system is simple, it lacks sufficient functional adsorption sites.                                                                                                                                                   | Chem. Eng. J., 2024, 489, 151423                           |
| NS-POPs (N,S-containing POPs)                   | Porous organic polymer                                | Schiff-base condensation          | Vapor / cyclohexane | 5100-5430 / 504.4-664.6 | Nitrogen, sulfur, and $\pi$ -conjugated electron-rich frameworks promote strong iodine binding, although the materials require multistep polymer                                                                                         | ACS Appl. Polym. Mater., 2024, 6, 7478–7487                |

|                               |                     |                                       |                    |            |                                                                                                                                                                                               |                                                    |
|-------------------------------|---------------------|---------------------------------------|--------------------|------------|-----------------------------------------------------------------------------------------------------------------------------------------------------------------------------------------------|----------------------------------------------------|
|                               |                     |                                       |                    |            | synthesis and extended reaction times.                                                                                                                                                        |                                                    |
| CNT / NCNT / OCNT             | CNT                 | CVD / oxidation / calcination         | Vapor              | 28.9-60.9  | Surface modification improves uptake but remains low; adsorption in limited media.                                                                                                            | Appl. Surf. Sci., 2023, 629, 157387                |
| Walnut shell activated carbon | Carbon              | High-temperature pyrolysis            | Vapor              | 606        | High-temperature synthesis; moderate iodine uptake.                                                                                                                                           | Chem. Eng. J., 2023, 454, 140365                   |
| Bi-rGO                        | Graphene composite  | Solvothermal reduction                | Vapor              | 1228       | Metal incorporation improves iodine affinity in graphene framework.                                                                                                                           | ACS Appl. Mater. Interfaces, 2023, 15, 40438–40450 |
| Sdots                         | Sulfur quantum dots | Solvothermal (S + oleylamine, 180 °C) | Vapor/ cyclohexane | 2676 / 290 | A facile synthesis method enables hydrophobic Sdots to achieve ultrahigh iodine uptake through the synergistic effects of sulfur- and nitrogen-rich sites along with the hydrophobic surface. | This work                                          |
